# Supplementary material for: Enhanced clinical assessment of hematologic malignancies through routine paired tumor and normal sequencing
Source: PubMed Central journal article supplement (PMC10613284; doi:10.1038/s41467-023-42585-9), 2023-10-28
Supplement: 41467_2023_42585_MOESM1_ESM.pdf [file 41467_2023_42585_MOESM1_ESM.pdf]

a) Tumor Types Represented in Validation (113 tumor samples)

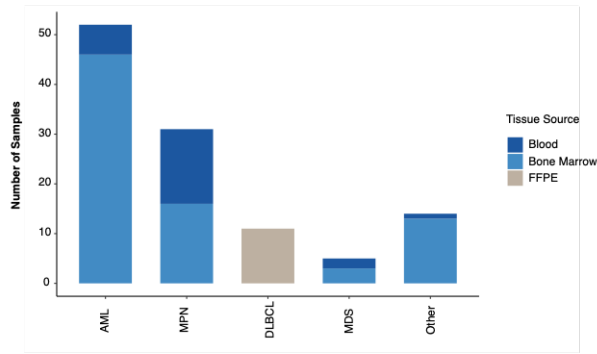

b) Accuracy (278 / 278 Variants detected)

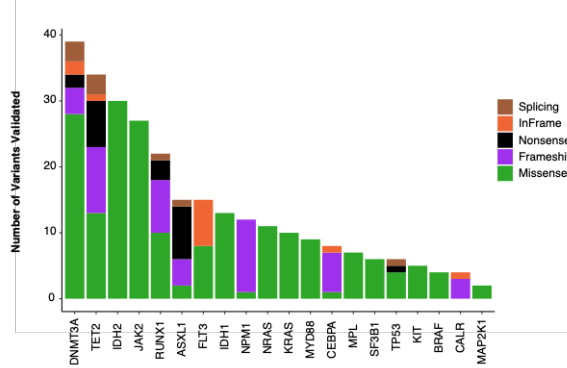

c) Reproducibility

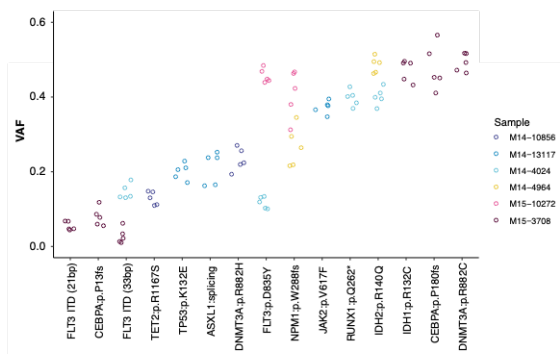

d) Sensitivity

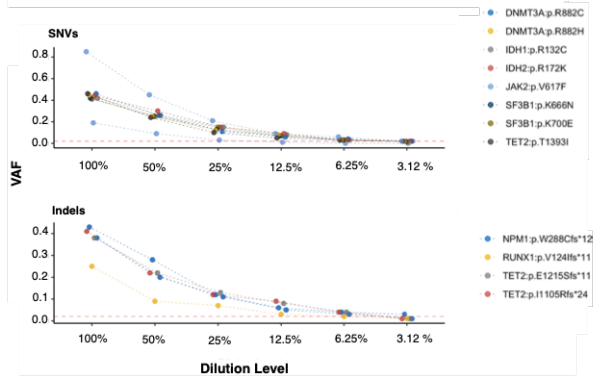

Supplementary Figure 1: MSK-IMPACT Heme validation study. a) Tumor and tissue types sequenced for MSK-IMPACT Heme assay validation. b) accuracy, c) reproducibility, and d) sensitivity results. Source data are provided as a Source Data file.

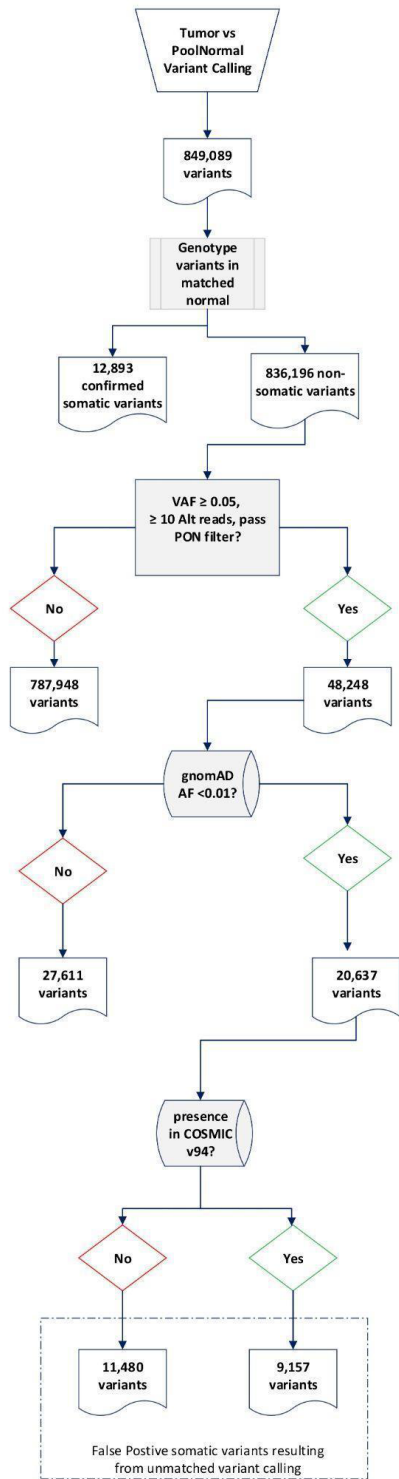

Supplementary Figure 2: Schematic of tumor-only variant calling analysis process and results using a threshold of 1% MAF in the gnomAD database.

a)

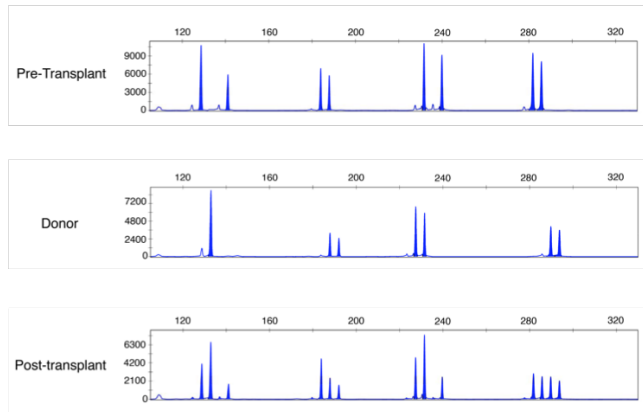

b)

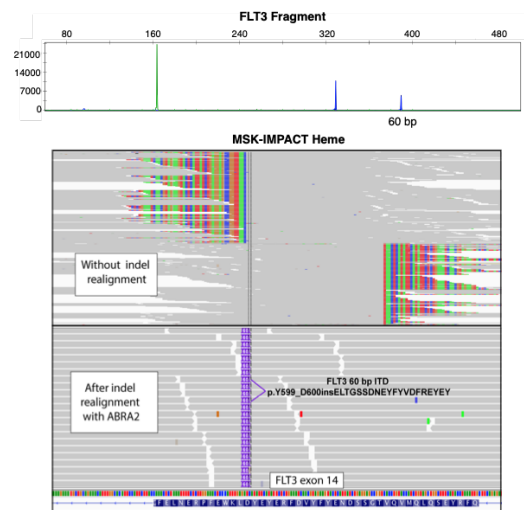

Supplementary Figure 3: Example patient case highlighting ability of FACETS2n to detect complex mutations in a post-transplant chimeric patient. (a) STR analysis of pre- and post-transplant patient bone marrow and donor blood samples (b) FLT3 fragment analysis (top) and indel realignment with MSK-IMPACT Heme are concordant for identification of a 60bp ITD.

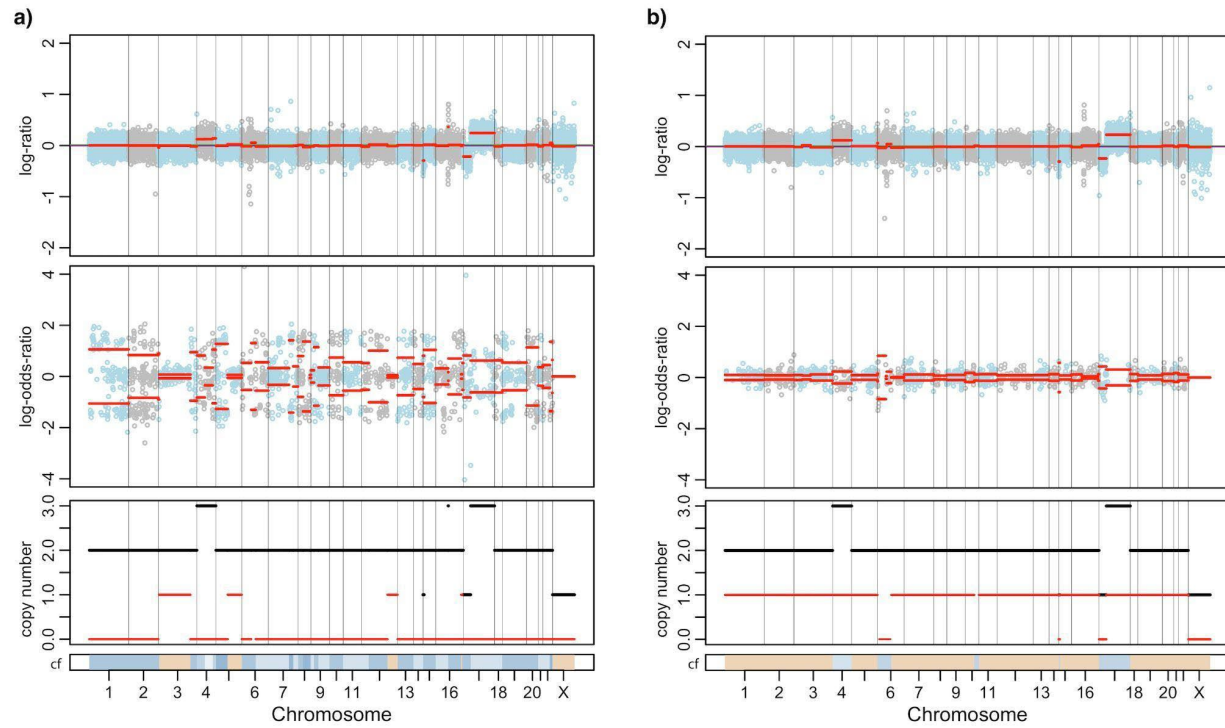

Supplementary Figure 4: Genome wide allele-specific copy number profile of a post-transplant patient obtained using (a) the baseline host germline reference and (b) the intersection of heterozygous SNPs between baseline host and baseline donor germline reference samples. Using a baseline reference from only one individual results in the inability to accurately identify regions of allelic imbalance due to host-donor chimerism in the post-transplant setting.

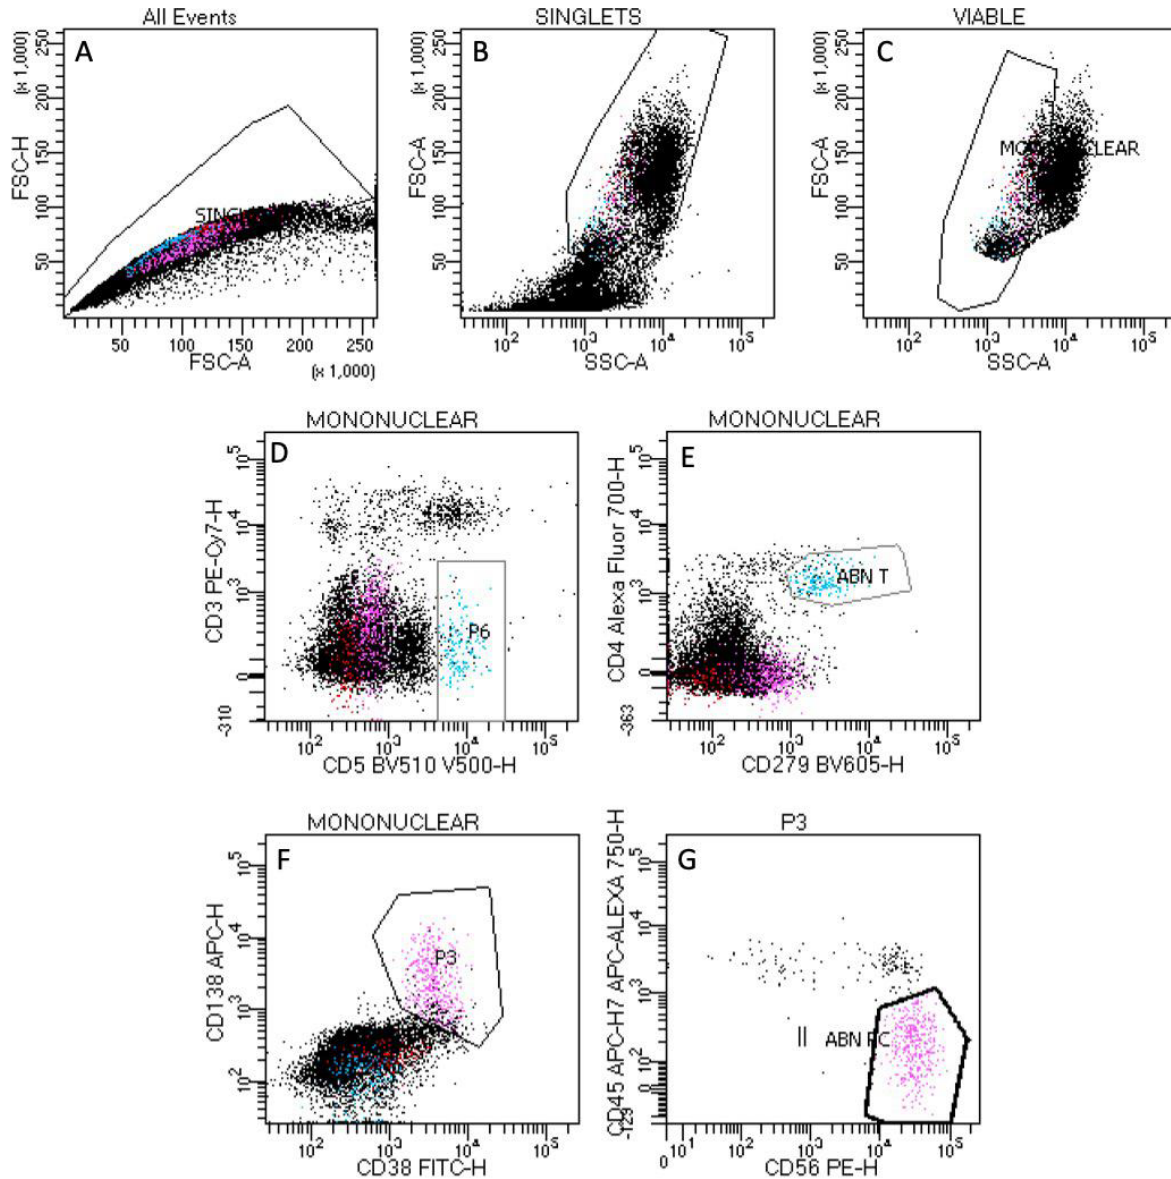

Supplementary Figure 5: Flow cytometry gating and sorting strategy for enrichment of specific cell populations. The plots demonstrate gating strategies to enrich for A) singlet events, B) viable cells, C) viable mononuclear cells, D) CD3-negative, CD-5 positive cells, E) abnormal T-cells with expression of CD4 and CD279, F) plasma cells with expression of CD38 (bright) and CD138, and G) abnormal plasma cells with aberrant expression of CD56.

**Supplementary Table 1: MSK-IMPACT Heme gene list**

|          |        |        |           |         |         |         |          |
|----------|--------|--------|-----------|---------|---------|---------|----------|
| ABL1     | BRD4   | DTX1   | GNAS      | KDM6A   | NF1     | RAD21   | SMO      |
| ACTG1    | BRIP1  | DUSP22 | GNB1      | KDR     | NF2     | RAD50   | SOCS1    |
| AKT1     | BTG1   | EED    | GRIN2A    | KEAP1   | NFE2    | RAD51   | SOX2     |
| AKT2     | BTK    | EGFR   | GSK3B     | KIT     | NFE2L2  | RAD51B  | SP140    |
| AKT3     | CALR   | EGR1   | H1-2      | KMT2A   | NKX2-1  | RAD51C  | SPEN     |
| ALK      | CARD11 | EP300  | H2BC5     | KMT2B   | NOTCH1  | RAD51D  | SPOP     |
| ALOX12B  | CASP8  | EP400  | H3C2      | KMT2C   | NOTCH2  | RAD52   | SRC      |
| AMER1    | CBFB   | EPHA3  | H3C8      | KMT2D   | NOTCH3  | RAD54L  | SRSF2    |
| APC      | CBL    | EPHA5  | HDAC1     | KMT5A   | NOTCH4  | RAF1    | STAG1    |
| AR       | CCND1  | EPHA7  | HDAC4     | KRAS    | NPM1    | RARA    | STAG2    |
| ARAF     | CCND2  | EPHB1  | HDAC7     | KSR2    | NRAS    | RB1     | STAT3    |
| ARHGEF28 | CCND3  | ERBB2  | HGF       | LCK     | NSD1    | REL     | STAT5A   |
| ARID1A   | CCNE1  | ERBB3  | HIF1A     | LMO1    | NT5C2   | RET     | STAT5B   |
| ARID1B   | CD274  | ERBB4  | HIST1H1B  | LTB     | NTRK1   | RHOA    | STAT6    |
| ARID2    | CD28   | ERG    | HIST1H1D  | MALT1   | NTRK2   | RICTOR  | STK11    |
| ARID3A   | CD58   | ESCO2  | HIST1H1E  | MAP2K1  | NTRK3   | RNF43   | SUFU     |
| ARID3B   | CD79A  | ESR1   | HIST1H2AC | MAP2K2  | P2RY8   | ROBO1   | SUZ12    |
| ARID3C   | CD79B  | ETNK1  | HIST1H2AG | MAP2K4  | PAK7    | ROS1    | SYK      |
| ARID4A   | CDC73  | ETV6   | HIST1H2AL | MAP3K1  | PALB2   | RPTOR   | TBL1XR1  |
| ARID4B   | CDH1   | EZH2   | HIST1H2AM | MAP3K13 | PARP1   | RRAGC   | TBX3     |
| ARID5A   | CDK12  | FANCA  | HIST1H2BC | MAP3K14 | PAX5    | RTEL1   | TENT5C   |
| ARID5B   | CDK4   | FANCC  | HIST1H2BG | MAPK1   | PBRM1   | RUNX1   | TERT     |
| ASXL1    | CDK6   | FANCD2 | HIST1H2BJ | MAPK3   | PCBP1   | RUNX1T1 | TET1     |
| ASXL2    | CDK8   | FAS    | HIST1H2BK | MCL1    | PDCD1   | SAMHD1  | TET2     |
| ATM      | CDKN1B | FAT1   | HIST1H2BO | MDM2    | PDGFRA  | SDHA    | TET3     |
| ATP6AP1  | CDKN2A | FBXO11 | HLA-A     | MDM4    | PDGFRB  | SDHB    | TGFBR2   |
| ATP6V1B2 | CDKN2B | FBXW7  | HNF1A     | MED12   | PDPK1   | SDHC    | TNFAIP3  |
| ATR      | CDKN2C | FGF19  | HRAS      | MEF2B   | PDS5B   | SDHD    | TNFRSF14 |
| ATRX     | CEBPA  | FGF3   | ID3       | MEN1    | PHF6    | SETBP1  | TOP1     |
| ATXN2    | CHEK1  | FGF4   | IDH1      | MET     | PIGA    | SETD1A  | TP53     |
| AURKA    | CHEK2  | FGFR1  | IDH2      | MGA     | PIK3C2G | SETD1B  | TP53     |
| AURKB    | CIC    | FGFR2  | IGF1      | MGAM    | PIK3C3  | SETD2   | TP63     |
| AXIN1    | CIITA  | FGFR3  | IGF1R     | MITF    | PIK3CA  | SETD3   | TRAF2    |
| AXL      | CRBN   | FGFR4  | IGF2      | MLH1    | PIK3CG  | SETD4   | TRAF3    |
| B2M      | CREBBP | FLCN   | IKBKE     | MOB3B   | PIK3R1  | SETD5   | TRAF5    |
| BACH2    | CRKL   | FLT1   | IKZF1     | MPEG1   | PIK3R2  | SETD6   | TSC1     |
| BAP1     | CRLF2  | FLT3   | IKZF3     | MPL     | PIM1    | SETD7   | TSC2     |
| BARD1    | CSF1R  | FLT4   | IL7R      | MRE11   | PLCG1   | SETDB1  | TSHR     |
| BCL10    | CSF3R  | FOXL2  | INPP4B    | MSH2    | PLCG2   | SETDB2  | TYK2     |
| BCL11B   | CTCF   | FOXO1  | IRF1      | MSH6    | PMS2    | SF3B1   | U2AF1    |
| BCL2     | CTNNB1 | FOXP1  | IRF4      | MTOR    | PNRC1   | SGK1    | U2AF2    |
| BCL6     | CUX1   | FURIN  | IRF8      | MUTYH   | POT1    | SH2B3   | UBR5     |
| BCOR     | CXCR4  | FYN    | IRS2      | MYC     | PPP2R1A | SMAD2   | VAV1     |
| BCORL1   | CYLD   | GATA1  | JAK1      | MYCL    | PRDM1   | SMAD4   | VAV2     |
| BCR      | DAXX   | GATA2  | JAK2      | MYCN    | PRKAR1A | SMARCA4 | VHL      |
| BIRC3    | DDR2   | GATA3  | JAK3      | MYD88   | PTCH1   | SMARCB1 | WHSC1    |
| BLM      | DDX3X  | GNA11  | JARID2    | NBN     | PTEN    | SMARCD1 | WT1      |
| BRAF     | DIS3   | GNA12  | JUN       | NCOR1   | PTPN1   | SMC1A   | XBP1     |
| BRCA1    | DNMT3A | GNA13  | KDM5A     | NCOR2   | PTPN11  | SMC3    | XPO1     |
| BRCA2    | DOT1L  | GNAQ   | KDM5C     | NCSTN   | PTPN2   | SMG1    | ZRSR2    |

**Supplementary Table 2: Effect of gnomAD MAF filtering threshold on number of reportable and potentially clinical actionable variants**

| gnomAD MAF Threshold | # Non-somatic variants <gnomAD threshold | # Non-somatic variants <gnomAD threshold that would change ICC/WHO classification* | % Cases with Non-somatic variant that would result in change to ICC/WHO classification* | # Non-somatic variants <gnomAD threshold in COSMIC v94 | Average # COSMIC variants <gnomAD threshold per sample | % Cases with a COSMIC variant <gnomAD threshold |
|----------------------|------------------------------------------|------------------------------------------------------------------------------------|-----------------------------------------------------------------------------------------|--------------------------------------------------------|--------------------------------------------------------|-------------------------------------------------|
| 1%                   | 20,637                                   | 42                                                                                 | 1.80%                                                                                   | 9,157                                                  | 4                                                      | 95.30%                                          |
| 0.50%                | 15,946                                   | 42                                                                                 | 1.80%                                                                                   | 5,958                                                  | 2.8                                                    | 89.50%                                          |
| 0.10%                | 10,523                                   | 42                                                                                 | 1.80%                                                                                   | 3,121                                                  | 2                                                      | 68.50%                                          |

\*Determination of whether a variant would alter ICC/WHO classification was determined by interrogating variant calls in the following genes: *ASXL1*, *BCOR*, *CEBPA*, *EZH2*, *IKZF1*, *NPM1*, *PAX5*, *RUNX1*, *SF3B1*, *SRSF2*, *STAG2*, *TP53*, *U2AF1*, *ZEB2*, and *ZRSR2*.

**Supplementary Table 3: Germline variants in DNMT3A, TET2, and TP53 filtered through use of matched normal**

| Gene   | VariantClass      | AAchange | Normal_VAF | Tumor_VAF | OncoTree Code |
|--------|-------------------|----------|------------|-----------|---------------|
| DNMT3A | Missense_Mutation | p.N501S  | 0.473      | 0.51001   | MDS Workup    |
| DNMT3A | Missense_Mutation | p.R55H   | 0.403      | 0.50403   | PMF           |
| DNMT3A | Missense_Mutation | p.E152K  | 0.444      | 0.49054   | PMF           |
| DNMT3A | Missense_Mutation | p.L639V  | 0.466      | 0.49645   | TAML          |
| TET2   | Missense_Mutation | p.P174H  | 0.47       | 0.48516   | AML           |
| TET2   | Missense_Mutation | p.P1655L | 0.389      | 0.4856    | AML           |
| TET2   | Missense_Mutation | p.V1718L | 0.489      | 0.45425   | AML           |
| TET2   | Missense_Mutation | p.R814C  | 0.48       | 0.47845   | AML           |
| TET2   | Missense_Mutation | p.P1575L | 0.419      | 0.49209   | AML           |
| TET2   | Missense_Mutation | p.R814C  | 0.42       | 0.52903   | AML           |
| TET2   | Missense_Mutation | p.H800Y  | 0.483      | 0.48808   | AML           |
| TET2   | Missense_Mutation | p.R1572Q | 0.469      | 0.54439   | AML           |
| TET2   | Missense_Mutation | p.H800Y  | 0.456      | 0.51434   | AML           |
| TET2   | Missense_Mutation | p.H800Y  | 0.488      | 0.48103   | AML           |
| TET2   | Missense_Mutation | p.H800Y  | 0.459      | 0.45229   | AML           |
| TET2   | Missense_Mutation | p.R1498P | 0.487      | 0.4661    | AML           |
| TET2   | Missense_Mutation | p.R1498P | 0.468      | 0.46892   | AML           |
| TET2   | Missense_Mutation | p.P1575L | 0.419      | 0.49819   | AML           |
| TET2   | Missense_Mutation | p.P1575L | 0.419      | 0.50332   | AML           |
| TET2   | Missense_Mutation | p.G1519R | 0.417      | 0.48665   | AML           |
| TET2   | Missense_Mutation | p.P174H  | 0.435      | 0.34118   | AML           |
| TET2   | Missense_Mutation | p.R1465Q | 0.443      | 0.49271   | CHIP          |
| TET2   | Missense_Mutation | p.P174H  | 0.435      | 0.50529   | CML           |
| TET2   | Missense_Mutation | p.R1095K | 0.517      | 0.40264   | CMML          |
| TET2   | Missense_Mutation | p.Y1589C | 0.483      | 0.44882   | CMML          |
| TET2   | Missense_Mutation | p.S1775N | 0.405      | 0.46604   | ET            |
| TET2   | Missense_Mutation | p.P1962L | 0.525      | 0.43248   | HDCN          |
| TET2   | Missense_Mutation | p.N275K  | 0.458      | 0.52224   | HDCN          |
| TET2   | Missense_Mutation | p.G453S  | 0.426      | 0.44207   | HDCN          |
| TET2   | Missense_Mutation | p.G453S  | 0.426      | 0.48491   | HDCN          |
| TET2   | Missense_Mutation | p.R581H  | 0.492      | 0.42308   | HDCN          |
| TET2   | Missense_Mutation | p.R814C  | 0.471      | 0.45896   | MDS           |
| TET2   | Missense_Mutation | p.R1498P | 0.468      | 0.42275   | MDS           |
| TET2   | Missense_Mutation | p.N767D  | 0.51       | 0.46517   | MDS           |
| TET2   | Missense_Mutation | p.R1498P | 0.471      | 0.47845   | MDS           |
| TET2   | Missense_Mutation | p.R1095K | 0.481      | 0.48071   | MDS           |
| TET2   | Missense_Mutation | p.E1010D | 0.491      | 0.49574   | MDS           |
| TET2   | Missense_Mutation | p.N1743D | 0.496      | 0.48712   | MDS           |
| TET2   | Missense_Mutation | p.V1718L | 0.482      | 0.45598   | MDS           |
| TET2   | Missense_Mutation | p.G429R  | 0.392      | 0.49561   | MDS           |
| TET2   | Missense_Mutation | p.Q810R  | 0.47       | 0.48105   | MDS Workup    |
| TET2   | Missense_Mutation | p.Q1068K | 0.503      | 0.46073   | MDS Workup    |
| TET2   | Missense_Mutation | p.S145N  | 0.381      | 0.48674   | MDS Workup    |
| TET2   | Missense_Mutation | p.Q810R  | 0.461      | 0.51684   | MDS Workup    |
| TET2   | Missense_Mutation | p.Y192H  | 0.502      | 0.49441   | MNM           |
| TET2   | Missense_Mutation | p.H1036Y | 0.483      | 0.48139   | MPN           |
| TET2   | Missense_Mutation | p.R1993L | 0.46       | 0.47385   | MPN           |
| TET2   | Missense_Mutation | p.R1993L | 0.46       | 0.51145   | MPN           |
| TET2   | Missense_Mutation | p.R814C  | 0.463      | 0.5       | MPN Workup    |
| TET2   | Missense_Mutation | p.N275K  | 0.528      | 0.48084   | MPN Workup    |
| TET2   | Missense_Mutation | p.V1426M | 0.418      | 0.48571   | PMF           |
| TP53   | Missense_Mutation | p.Q317K  | 0.457      | 0.44129   | AML           |
| TP53   | Missense_Mutation | p.P4L    | 0.452      | 0.48894   | CHIP          |
| TP53   | Missense_Mutation | p.V31I   | 0.403      | 0.4258    | MPN           |



Supplementary Table 4: SCNA validation accuracy

|              | SNP-Array<br>CNVs present | SNP-Array<br>CNVs not<br>present | Total |
|--------------|---------------------------|----------------------------------|-------|
| (MSK-IMPACT) | 130                       | 0                                | 130   |
| (MSK-IMPACT) | 10                        | 756                              | 766   |
| Total        | 140                       | 756                              | 896   |

**Supplementary Table 5: SCNA validation sensitivity study for 12p Gain**

| <b>Sample ID</b> | <b>Dilution (%)</b> | <b>Arm</b> | <b>Tumor</b> | <b>Total copy number</b> | <b>Lower copy number</b> | <b>cf.em. impact</b> | <b>Results by MSK-IMPACT Heme</b> |
|------------------|---------------------|------------|--------------|--------------------------|--------------------------|----------------------|-----------------------------------|
| M19-29320        | 100%                | 12p gain   | DLBCL        | 18                       | 1                        | 89%                  | GAIN                              |
| M19-29320-50     | 50%                 | 12p gain   | DLBCL        | 19                       | 1                        | 44%                  | GAIN                              |
| M19-29320-25     | 25%                 | 12p gain   | DLBCL        | 22                       | 1                        | 21%                  | GAIN                              |
| M19-29320-12     | 12.00%              | 12p gain   | DLBCL        | 9                        | 1                        | <20%                 | GAIN                              |
| M19-29320-6      | 6.00%               | 12p gain   | DLBCL        | 5                        | 1                        | <20%                 | GAIN                              |

**Supplementary Table 6: SCNA validation sensitivity study for 13q loss**

| Sample ID    | Dilution (%) | Arm      | Tumor | Total copy number | Lower copy number | cf.em. impact | Results by MSK-IMPACT Heme |
|--------------|--------------|----------|-------|-------------------|-------------------|---------------|----------------------------|
| M19-29320    | 100%         | 13q loss | DLBCL | 1                 | 0                 | 89%           | LOSS                       |
| M19-29320-50 | 50%          | 13q loss | DLBCL | 1                 | 0                 | 44%           | LOSS                       |
| M19-29320-25 | 25%          | 13q loss | DLBCL | 2                 | 0                 | 21%           | LOSS                       |
| M19-29320-12 | 12.00%       | 13q loss | DLBCL | 1                 | 0                 | <20%          | LOSS                       |
| M19-29320-6  | 6.00%        | 13q loss | DLBCL | 2                 | 1                 | 100%          | DIPLOID                    |
